# Supplementary material
Source: Research Square preprint supplement (doi:10.21203/rs.3.rs-9716243/v1)
Supplement: Supplementary file 1 [file fbc731c18096c3c8a6cf5a58.docx]

**Table 1 : Demographic Profile of Respondents**

| **Variables** | **Category** | **Frequency (n)** | **Percentage (%)** |
| --- | --- | --- | --- |
| **Age** | 18–24 | 78 | 41.9 |
|  | 25–30 | 66 | 35.5 |
|  | 31–35 | 30 | 16.1 |
|  | Above 35 | 12 | 6.5 |
| **Education** | Undergraduate | 43 | 23.1 |
|  | Postgraduate | 103 | 55.4 |
|  | Doctorate/Professional | 40 | 21.5 |
| **Monthly Income (INR)** | Below 25,000 | 55 | 29.6 |
|  | 25,000–50,000 | 75 | 40.3 |
|  | Above 50,000 | 56 | 30.1 |
| **Current Product Use** | Disposable Sanitary Pads | 141 | 75.8 |
|  | Tampons | 21 | 11.3 |
|  | Reusable Pads/Cups | 24 | 12.9 |
| **Occupation** | Students | 70 | 37.6 |
|  | Working Professionals | 43 | 43.0 |
|  | Housewives | 19 | 19.7 |

Source: Authors’ own work.

Table 2: Results of the measurement model

| Constructs | Factor Loading | Cronbach’s Alpha | AVE | CR | Mean | SD |
| --- | --- | --- | --- | --- | --- | --- |
| Perceived severity |  | 0.899 | 0.848 | 0.917 |  |  |
| PS1 | 0.852 |  |  |  | 3.214 | 0.981 |
| PS1 | 0.833 |  |  |  | 3.432 | 1.022 |
| PS1 | 0.987 |  |  |  | 3.222 | 1.018 |
| Perceived Vulnerability |  | 0.875 | 0.887 | 0.940 |  |  |
| PV1 | 0.924 |  |  |  | 3.231 | 1.024 |
| PV2 | 0.959 |  |  |  | 3.433 | 0.859 |
| PV3 | 0.782 |  |  |  | 3.231 | 0.982 |
| Self Efficacy |  | 0.858 | 0.778 | 0.913 |  |  |
| SE1 | 0.887 |  |  |  | 3.512 | 0.926 |
| SE2 | 0.711 |  |  |  | 3.324 | 0.821 |
| SE3 | 0.847 |  |  |  | 3.232 | 1.028 |
| Response efficacy |  | 0.903 | 0.828 | 0.935 |  |  |
| RE1 | 0.842 |  |  |  | 3.330 | 0.921 |
| RE2 | 0.964 |  |  |  | 2.430 | 0.854 |
| RE3 | 0.921 |  |  |  | 3.432 | 0.823 |
| Response cost |  | 0.945 | 0.896 | 0.963 |  |  |
| RC1 | 0.962 |  |  |  | 2.130 | 0.932 |
| RC2 | 0.764 |  |  |  | 3.211 | 0.942 |
| RC3 | 0.912 |  |  |  | 2.232 | 0.912 |
| Digital health literacy |  | 0.862 | 0.782 | 0.915 |  |  |
| DHL1 | 0.881 |  |  |  | 3.112 | 1.021 |
| DHL2 | 0.921 |  |  |  | 2.112 | 0.918 |
| DHL3 | 0.873 |  |  |  | 3.120 | 1.822 |
| Intention |  | 0.861 | 0.783 | 0.915 |  |  |
| INT1 | 0.897 |  |  |  | 2.312 | 0.788 |
| INT2 | 0.876 |  |  |  | 3.112 | 0.987 |
| INT3 | 0.881 |  |  |  | 3.432 | 0.974 |
| Actual Behaviour |  | 0.840 | 0.742 | 0.895 |  |  |
| BEH1 | 0.868 |  |  |  | 3.211 | 0.980 |
| BEH2 | 0.953 |  |  |  | 2.152 | 0.891 |
| BEH3 | 0.752 |  |  |  | 2.432 | 0.886 |

Source: Authors’ own work.

Table 3: Discriminant validity heterotrait-montrait ratio (HTMT)

|  | **Behavior** | **Digital Health Literacy** | **Intention** | **Response Cost** | **Response Efficacy** | **Self Efficacy** | **Severity** | **Vulnerability** |
| --- | --- | --- | --- | --- | --- | --- | --- | --- |
| **Behavior** |  |  |  |  |  |  |  |  |
| **Digital Health Literacy** | 0.516 |  |  |  |  |  |  |  |
| **Intention** | 0.267 | 0.220 |  |  |  |  |  |  |
| **Response Cost** | 0.087 | 0.231 | 0.264 |  |  |  |  |  |
| **Response Efficacy** | 0.205 | 0.070 | 0.265 | 0.188 |  |  |  |  |
| **Self Efficacy** | 0.178 | 0.312 | 0.639 | 0.080 | 0.188 |  |  |  |
| **Severity** | 0.054 | 0.242 | 0.096 | 0.293 | 0.188 | 0.042 |  |  |
| **Vulnerability** | 0.110 | 0.093 | 0.103 | 0.241 | 0.309 | 0.186 | 0.144 |  |

Source: Authors’ own work.

| Table 4: Path Coefficients and Hypothesis Testing Results   |  | **Path Coefficients** | **Beta** | **T Values** | **Decision** | **P-values** | | --- | --- | --- | --- | --- | --- | | H1 | Perceived Severity → Intention | 0.290 | 5.487 | Supported | <0.001 | | H2 | Perceived Vulnerability → intention | 0.277 | 4.880 | Supported | <0.001 | | **H3** | Response Cost → Intention | 0.375 | 6.296 | Supported | <0.001 | | **H4** | Response Efficacy → Intention | −0.030 | 0.367 | Not Supported | 0.857 | | **H5** | Self-Efficacy → Intention | 0.071 | 0.625 | Not Supported | 0.625 | | **H6** | Intention → Action Behavior | 0.345 | 6.233 | Supported | <0.001 | | **H7** | Digital Health Literacy (Moderator) → Intention | −0.292 | 5.574 | Not Supported | 0.574 | |  |
| --- | --- | --- | --- | --- | --- | --- | --- | --- | --- | --- | --- | --- | --- | --- | --- | --- | --- | --- | --- | --- | --- | --- | --- | --- | --- | --- | --- | --- | --- | --- | --- | --- | --- | --- | --- | --- | --- | --- | --- | --- | --- | --- | --- | --- | --- | --- | --- | --- | --- |

Source: Authors’ own work.
